# Supplementary material for: Cross-Cultural Adaptation and Validation of the Portuguese Version of the Psychosocial Impact of Dental Aesthetics Questionnaire
Source: MDPI journal article supplement (doi:10.3390/ijerph19169931), 2022-08-11
Supplement: s1 [file s1]

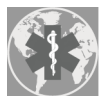

## Supplementary Materials

**Table S1.** Original and Portuguese versions of the PIDAQ questionnaire.

|         | Original                                                                                  | Portuguese                                                                                                     |
|---------|-------------------------------------------------------------------------------------------|----------------------------------------------------------------------------------------------------------------|
| Item 1  | I am proud of my teeth <sup>R</sup>                                                       | Tenho orgulho nos meus dentes <sup>R</sup>                                                                     |
| Item 2  | I like to show my teeth when I smile <sup>R</sup>                                         | Gosto de mostrar os meus dentes quando sorrio <sup>R</sup>                                                     |
| Item 3  | I am pleased when I see my teeth in the mirror <sup>R</sup>                               | Fico feliz quando vejo os meus dentes ao espelho <sup>R</sup>                                                  |
| Item 4  | My teeth are attractive to others <sup>R</sup>                                            | Os meus dentes são atrativos para os outros <sup>R</sup>                                                       |
| Item 5  | I am satisfied with the appearance of my teeth <sup>R</sup>                               | Estou satisfeito(a) com a aparência dos meus dentes <sup>R</sup>                                               |
| Item 6  | I find my tooth position to be very nice <sup>R</sup>                                     | Acho que a posição dos meus dentes é muito boa <sup>R</sup>                                                    |
| Item 7  | I hold myself back when I smile so my teeth don't show so much                            | Eu contenho-me quando sorrio para que os meus dentes não apareçam tanto                                        |
| Item 8  | If I don't know people well I am sometimes concerned what they might think about my teeth | Se eu não conheço bem as pessoas, às vezes fico preocupado(a) com o que elas podem pensar sobre os meus dentes |
| Item 9  | I'm afraid other people could make offensive remarks about my teeth                       | Temo que outras pessoas possam fazer comentários ofensivos sobre os meus dentes                                |
| Item 10 | I am somewhat inhibited in social contacts because of my teeth                            | Sinto-me um pouco constrangido(a) nos contactos sociais por causa dos meus dentes                              |
| Item 11 | I sometimes catch myself holding my hand in front of my mouth to hide my teeth            | Às vezes, noto que coloco a mão à frente da boca para esconder os dentes                                       |
| Item 12 | Sometimes I think people are staring at my teeth                                          | Às vezes acho que as pessoas estão a olhar para os meus dentes                                                 |
| Item 13 | Remarks about my teeth irritate me even when they are meant jokingly                      | Comentários sobre os meus dentes irritam-me, mesmo quando são feitos em jeito de brincadeira                   |
| Item 14 | I sometimes worry about what members of the opposite sex think about my teeth             | Às vezes preocupo-me com o que pessoas que me atraem pensam sobre os meus dentes                               |
| Item 15 | I envy the nice teeth of other people                                                     | Eu invejo os dentes bonitos de outras pessoas                                                                  |
| Item 16 | I am somewhat distressed when I see other people's teeth                                  | Fico um pouco angustiado(a) quando vejo os dentes de outras pessoas                                            |
| Item 17 | Sometimes I am somewhat unhappy about the appearance of my teeth                          | Às vezes fico um pouco descontente com a aparência dos meus dentes                                             |
| Item 18 | I think most people I know have nicer teeth than I do                                     | Acho que a maioria das pessoas que conheço tem dentes melhores do que eu                                       |
| Item 19 | I feel bad when I think about what my teeth look like                                     | Eu sinto-me mal quando penso em como os meus dentes são                                                        |
| Item 20 | I wish my teeth looked better                                                             | Eu gostava que os meus dentes parecessem melhores                                                              |
| Item 21 | I don't like to see my teeth in the mirror                                                | Não gosto de ver os meus dentes ao espelho                                                                     |
| Item 22 | I don't like to see my teeth in photographs                                               | Não gosto de ver os meus dentes em fotografias                                                                 |
| Item 23 | I don't like to see my teeth when I look at a video of myself                             | Não gosto de ver os meus dentes quando assisto a um vídeo meu                                                  |

<sup>R</sup> Indicates items that are reverse scored. These twelve items are rated on a response scale: 1 = "Not at all", 2 = "A little", 3 = "Somewhat", 4 = "Strongly", and 5 = "Very strongly" (in portuguese 1= "Não de todo"; 2 = "Um pouco"; 3 = "Às vezes"; 4 = "Concordo"; 5 = "Concordo totalmente").

**Table S2.** Test–retest reliability using ICCs for the PIDAQ-PT questionnaire.

|         | <b>Cronbach's <math>\alpha</math> Coefficient<br/>(95% CI)</b> | <b>ICC (95% CI)</b> | <b><i>p</i>-Value</b> |
|---------|----------------------------------------------------------------|---------------------|-----------------------|
| Item 1  | 0.99 (0.97; 1.00)                                              | 0.98 (0.96; 0.99)   | <0.001                |
| Item 2  | 0.97 (0.93; 0.99)                                              | 0.95 (0.91; 0.97)   | <0.001                |
| Item 3  | 0.94 (0.88; 0.97)                                              | 0.88 (0.80; 0.93)   | <0.001                |
| Item 4  | 0.93 (0.88; 0.97)                                              | 0.88 (0.79; 0.93)   | <0.001                |
| Item 5  | 0.91 (0.83; 0.95)                                              | 0.83 (0.72; 0.90)   | <0.001                |
| Item 6  | 0.90 (0.84; 0.95)                                              | 0.82 (0.71; 0.90)   | <0.001                |
| Item 7  | 0.77 (0.55; 0.91)                                              | 0.63 (0.43; 0.77)   | <0.001                |
| Item 8  | 0.78 (0.54; 0.95)                                              | 0.65 (0.46; 0.79)   | <0.001                |
| Item 9  | 0.87 (0.75; 0.94)                                              | 0.77 (0.63; 0.86)   | <0.001                |
| Item 10 | 0.91 (0.78; 0.98)                                              | 0.83 (0.72; 0.90)   | <0.001                |
| Item 11 | 0.85 (0.54; 0.97)                                              | 0.74 (0.59; 0.85)   | <0.001                |
| Item 12 | 0.79 (0.55; 0.91)                                              | 0.66 (0.47; 0.79)   | <0.001                |
| Item 13 | 0.86 (0.68; 0.94)                                              | 0.74 (0.58; 0.85)   | <0.001                |
| Item 14 | 0.80 (0.59; 0.91)                                              | 0.66 (0.47; 0.79)   | <0.001                |
| Item 15 | 0.82 (0.63; 0.93)                                              | 0.69 (0.52; 0.81)   | <0.001                |
| Item 16 | 0.76 (0.42; 0.92)                                              | 0.62 (0.41; 0.76)   | <0.001                |
| Item 17 | 0.87 (0.79; 0.93)                                              | 0.77 (0.63; 0.86)   | <0.001                |
| Item 18 | 0.79 (0.57; 0.90)                                              | 0.66 (0.46; 0.79)   | <0.001                |
| Item 19 | 0.87 (0.67; 0.96)                                              | 0.78 (0.64; 0.87)   | <0.001                |
| Item 20 | 0.90 (0.81; 0.96)                                              | 0.82 (0.70; 0.89)   | <0.001                |
| Item 21 | 0.90 (0.74; 0.98)                                              | 0.82 (0.71; 0.90)   | <0.001                |
| Item 22 | 0.84 (0.65; 0.94)                                              | 0.73 (0.57; 0.84)   | <0.001                |
| Item 23 | 0.92 (0.84; 0.97)                                              | 0.86 (0.77; 0.92)   | <0.001                |

CI—confidence interval; ICC—intraclass correlation coefficient.

Table S3. Correlation between PIDAQ item scores.

| Items | 1     | 2         | 3         | 4         | 5         | 6         | 7          | 8         | 9         | 10         | 11        | 12        | 13        | 14        | 15         | 16       | 17         | 18         | 19         | 20         | 21         | 22         | 23         |
|-------|-------|-----------|-----------|-----------|-----------|-----------|------------|-----------|-----------|------------|-----------|-----------|-----------|-----------|------------|----------|------------|------------|------------|------------|------------|------------|------------|
| 1     | 1.000 | 0.773 *** | 0.825 *** | 0.795 *** | 0.804 *** | 0.684 *** | -0.330 *** | -0.322 ** | -0.317 ** | -0.400 *** | -0.428 ** | -0.209 *  | -0.241 *  | -0.207 *  | -0.286 *** | -0.106 * | -0.538 *** | -0.426 *** | -0.517 *** | -0.563 *** | -0.543 *** | -0.523 *** | -0.503 *** |
| 2     | -     | 1.000     | 0.831 *** | 0.771 *** | 0.765 *** | 0.642 *** | -0.467 *** | -0.411 ** | -0.381 ** | -0.461 *** | -0.454 ** | -0.226 *  | -0.298 *  | -0.236 *  | -0.332 *** | -0.160 * | -0.569 *** | -0.446 *** | -0.555 *** | -0.505 *** | -0.599 *** | -0.583 *** | -0.548 *** |
| 3     | -     | -         | 1.000     | 0.846 *** | 0.851 *** | 0.696 *** | -0.399 *** | -0.348 ** | -0.319 *  | -0.429 *** | -0.419 ** | -0.215 *  | -0.269 *  | -0.224 *  | -0.337 *** | -0.138 * | -0.580 *** | -0.467 *** | -0.540 *** | -0.588 *** | -0.605 *** | -0.578 *** | -0.542 *** |
| 4     | -     | -         | -         | 1.000     | 0.812 *** | 0.727 *** | -0.362 *** | -0.301 *  | -0.268 *  | -0.383 *** | -0.387 ** | -0.130 *  | -0.209 *  | -0.171 *  | -0.329 *** | -0.093 * | -0.547 *** | -0.435 *** | -0.496 *** | -0.595 *** | -0.546 *** | -0.531 *** | -0.498 *** |
| 5     | -     | -         | -         | -         | 1.000     | 0.737 *** | -0.404 *** | -0.398 ** | -0.313 ** | -0.437 *** | -0.430 ** | -0.218 *  | -0.301 *  | -0.253 *  | -0.298 *** | -0.114 * | -0.604 *** | -0.435 *** | -0.585 *** | -0.616 *** | -0.599 *** | -0.565 *** | -0.535 *** |
| 6     | -     | -         | -         | -         | -         | 1.000     | -0.323 *** | -0.284 ** | -0.263 *  | -0.369 *** | -0.331 ** | -0.185 *  | -0.180 *  | -0.203 *  | -0.277 *** | -0.084 * | -0.547 *** | -0.368 *** | -0.450 *** | -0.540 *** | -0.520 *** | -0.501 *** | -0.480 *** |
| 7     | -     | -         | -         | -         | -         | -         | 1.000      | 0.696 *** | 0.587 *** | 0.653 ***  | 0.504 *** | 0.365 *** | 0.397 *** | 0.406 *** | 0.316 *    | 0.271 *  | 0.479 ***  | 0.482 ***  | 0.510 ***  | 0.392 ***  | 0.530 ***  | 0.529 ***  | 0.512 ***  |
| 8     | -     | -         | -         | -         | -         | -         | -          | 1.000     | 0.723 *** | 0.686 ***  | 0.570 *** | 0.472 *** | 0.516 *** | 0.498 *** | 0.307      | 0.294 ** | 0.495 **   | 0.474 **   | 0.547 ***  | 0.363 *    | 0.496 **   | 0.467 **   | 0.470 **   |
| 9     | -     | -         | -         | -         | -         | -         | -          | -         | 1.000     | 0.758 ***  | 0.633 *** | 0.557 *** | 0.594 *** | 0.545 *** | 0.270      | 0.330 ** | 0.488 **   | 0.464 *    | 0.598 ***  | 0.348 *    | 0.482 **   | 0.451 **   | 0.473 **   |
| 10    | -     | -         | -         | -         | -         | -         | -          | -         | -         | 1.000      | 0.660 *** | 0.539 *** | 0.520 *** | 0.496 *** | 0.350 *    | 0.336 ** | 0.619 ***  | 0.537 ***  | 0.700 ***  | 0.427 **   | 0.614 ***  | 0.564 ***  | 0.559 ***  |
| 11    | -     | -         | -         | -         | -         | -         | -          | -         | -         | -          | 1.000     | 0.597 *** | 0.604 *** | 0.553 *** | 0.333      | 0.332 ** | 0.552 ***  | 0.482 **   | 0.638 ***  | 0.397 *    | 0.510 **   | 0.530 **   | 0.508 **   |
| 12    | -     | -         | -         | -         | -         | -         | -          | -         | -         | -          | -         | 1.000     | 0.494 *** | 0.525 *** | 0.244      | 0.292 ** | 0.375 **   | 0.355 *    | 0.490 ***  | 0.276      | 0.357 *    | 0.348 *    | 0.348 *    |
| 13    | -     | -         | -         | -         | -         | -         | -          | -         | -         | -          | -         | -         | 1.000     | 0.682 *** | 0.248      | 0.364 ** | 0.493 **   | 0.408 *    | 0.581 ***  | 0.359 *    | 0.430 **   | 0.426 *    | 0.453 **   |
| 14    | -     | -         | -         | -         | -         | -         | -          | -         | -         | -          | -         | -         | -         | 1.000     | 0.330      | 0.289 ** | 0.483 **   | 0.407 *    | 0.521 ***  | 0.328      | 0.378 *    | 0.393 *    | 0.416 *    |
| 15    | -     | -         | -         | -         | -         | -         | -          | -         | -         | -          | -         | -         | -         | -         | 1.000      | 0.387 ** | 0.468 ***  | 0.480 ***  | 0.393 ***  | 0.501 ***  | 0.415 ***  | 0.484 ***  | 0.427 ***  |
| 16    | -     | -         | -         | -         | -         | -         | -          | -         | -         | -          | -         | -         | -         | -         | -          | 1.000    | 0.320 **   | 0.341 **   | 0.344 **   | 0.226 **   | 0.315 *    | 0.310 **   | 0.290 *    |
| 17    | -     | -         | -         | -         | -         | -         | -          | -         | -         | -          | -         | -         | -         | -         | -          | -        | 1.000      | 0.541 ***  | 0.716 ***  | 0.598 ***  | 0.693 ***  | 0.663 ***  | 0.644 ***  |
| 18    | -     | -         | -         | -         | -         | -         | -          | -         | -         | -          | -         | -         | -         | -         | -          | -        | -          | 1.000      | 0.601 ***  | 0.579 ***  | 0.559 ***  | 0.596 ***  | 0.570 ***  |
| 19    | -     | -         | -         | -         | -         | -         | -          | -         | -         | -          | -         | -         | -         | -         | -          | -        | -          | -          | 1.000      | 0.558 ***  | 0.658 ***  | 0.613 ***  | 0.621 ***  |
| 20    | -     | -         | -         | -         | -         | -         | -          | -         | -         | -          | -         | -         | -         | -         | -          | -        | -          | -          | -          | 1.000      | 0.557 ***  | 0.564 ***  | 0.551 ***  |
| 21    | -     | -         | -         | -         | -         | -         | -          | -         | -         | -          | -         | -         | -         | -         | -          | -        | -          | -          | -          | -          | 1.000      | 0.818 ***  | 0.772 ***  |
| 22    | -     | -         | -         | -         | -         | -         | -          | -         | -         | -          | -         | -         | -         | -         | -          | -        | -          | -          | -          | -          | -          | 1.000      | 0.860 ***  |
| 23    | -     | -         | -         | -         | -         | -         | -          | -         | -         | -          | -         | -         | -         | -         | -          | -        | -          | -          | -          | -          | -          | -          | 1.000      |

\*  $p < 0.05$ , \*\*  $p < 0.01$ , \*\*\*  $p < 0.001$ .
